# Supplementary material for: Joint assembly and genetic mapping of the Atlantic horseshoe crab genome reveals ancient whole genome duplication
Source: PubMed Central journal article supplement (PMC4066314; doi:10.1186/2047-217x-3-9), 2014-05-14
Supplement: 2047-217X-3-9-S1.pdf [file 2047-217X-3-9-S1.pdf]

| name                                         | sequence<br>'!' for match                                       | accession      | position   | class |
|----------------------------------------------|-----------------------------------------------------------------|----------------|------------|-------|
|                                              |                                                                 |                | LG:coord.  |       |
| EVX-1                                        | QMRRYRTAFTREQIARLEKEFYRENVSRPRCELAAALNLPETTIKVWFQNRMRKDKRQRLA   | P23683.1       |            |       |
| g_ayrxn_scaff_4445_1.Contig24                | --.....L.....C..S.....S...R.-----                               |                | 1 : 7968   | evx   |
| g_algxc_scaff_4707_1.Contig9                 | KE..S.....E..LEY..RT.E.TQ.PDVYT.E...QRTK.T.ARVO.-----           |                | 1 : 2335   | ?     |
| g_ajgny_scaff_5092_1.Contig4                 | KAK.I..I..A..LN...A..LQQQ.MVGRE.SH..SE...K.AQV.....I.WRK----    |                | 4 : 26846  | ?     |
| g_ahyur_scaff_4335_1.Contig2                 | -AK.V..I..A..LD...T..E.QQ.MVG.E.LQ..S...T.AQV.....I.WRK.HFD     |                | 1 : 3106   | ?     |
| engrailed_Tribolium_castaneum_               | EEK.P....SGA.L...KH..AENR.LTER..QQ.S.E.G.N.AQ..I....K.A.I.KASGO | NP_001034511.2 |            |       |
| engrailed_isoform_A_Drosophila_melanogaster_ | DEK.P....SS..L...KR..NENR.LTER..QQ.SSE.G.N.AQ..I....K.A.I.KSTGS | NP_523700.2    |            |       |
| engrailed_Branchiostoma_floridae_            | EEK.P....S..LQ..K...QENR.LTEQ..QD..RE.K.N.SQ..I....K.A.I.KAAGV  | EEN68949.1     |            |       |
| g_addne_scaff_4497_1.Contig54                | EEK.P....TD.L...K...HENR.LTEK..Q...RE.Q.N.SQ..I....K.A.I.KSTGE  |                | 1 : 5794   | en    |
| g_ausca_scaff_4858_1.Contig1                 | DEK.P....AD.L...KQ..QENR.LTEK..QD..LD.Q.N.SQ..I....K.A.I.KASGO  |                | 20 : 83001 | en    |
| g_adwrx_scaff_4421_1.Contig72                | DEK.P....AD.L...KA..QENR.LTEK..QD..RG.Q.N.SQ..I....K.A.I.KATGH  |                | 15 : 71297 | en    |
| g_avzuc_scaff_4437_1.Contig3                 | DEK.P....TD.L...KA..QENK-LTEK..QD..RE-----                      |                | 21 : 85367 | en    |
| g_adwrx_scaff_4421_1.Contig61                | DEK.P....TD.L...KA..QENR.LTEK..QD..RE.Q.N.SQ..I.-----           |                | 15 : 71297 | en    |
| g_avzuc_scaff_4437_1.Contig4                 | -----QENR.LTEK..QD..RE.Q.N.SQ..I....K.A.I.KATGH                 |                | 21 : 85367 | en    |
| g_adwrx_scaff_4421_1.Contig63                | -EK.P....AD.L...KA..QENR.LTEK..QD..RE.Q.N.SQ..I....K.A.I.KAVGH  |                | 15 : 71297 | en    |
| g_ayadw_scaff_4575_1.Contig4                 | DEK.P....AD.L...KA..QENR.LTEK..QD..RE.Q.N.SQ..I....K.A.I.KAVGH  |                | 3 : 22654  | en    |
| Nkx-2.2a                                     | KK.KR.VL.SKA.TYE..RR.RQQR.L.A.E.EH..SLIR.TP.QV.I...H.Y.M..A.AE  | NP_571497.1    |            |       |
| Nkx-2.2                                      | KK.KR.VL.SKA.TYE..RR.RQQR.L.A.E.EH..SLIR.TP.QV.I...H.Y.M..A.AE  | NP_002500.1    |            |       |
| Nkx-2.2_Gallus_gallus_                       | KK.KR.VL.SKA.TYE..RR.RQQR.L.A.E.EH..SLIR.TP.QV.I...H.Y.M..A.AE  | XP_003643855.1 |            |       |
| g_ajlua_scaff_4446_1.Contig10                | KK.KR.VL.SKA.TYE..RR.RQQR.L.A.E.EH..NFIR.TP.QV.I...H.Y.T..A.QE  |                | 1 : 1567   | nkx2  |
| g_acfsj_scaff_4532_1.Contig25                | KK.KR.VL.SKA.TYE..RR.RQQR.L.A.E.EH..SIIR.TP.QV.I...H.Y.T..A.QE  |                | 3 : 20058  | nkx2  |
| ladybird-like_3                              | KR.KS....SNQ.LFE..RR.V.QK.L.PAD.DQ..QRA.SSAQVIT.....A.L..DLDE   | NP_001038133.1 |            |       |
| lady_bird-like_1_homolog                     | KR.KS....NH..YE..R.LYQK.L.PAD.DQI.QQ.G.TNAQVIT.....A.L..DLEE    | NP_001007135.1 |            |       |
| g_acdli_scaff_4927_1.Contig5                 | KK.KS....NH..FE..R.LYQK.L.PAD.D.I.QS.G.TNAQVIT.....A.L.-----    |                | 26 : 93066 | lbx   |
| g_agfxy_scaff_4755_1.Contig8                 | KK.KS....NQ..FE..R.LYQK.L.PAD.D.I.QS.R.TNAQVIT.....A.L.-----    |                | 13 : 67147 | lbx   |
| g_aplvp_scaff_4845_1.Contig14                | KK.KS....NH..FE..R.LYQK.L.PAD.D.I.QS.G.TNAQVIT.....A.L.-----    |                | 1 : 3106   | lbx   |
| AGAP003673-<br>PA_Anopeles_gambiae_str_PEST_ | KK.KS....NH..FE..R.LYQK.L.PSD.D.I...G.SNAQVIT.....A.L..DMEE     | EAA04094       |            |       |
| g_amhlt_scaff_4436_1.Contig3                 | KQ.KA....DH.LQT...C.E.QK.L.VQE.M...SK...TD.QV.T.Y.....          |                | 8 : 46729  | ?     |
| g_amhlt_scaff_4436_1.Contig8                 | KE.KA....DY..QT...R.QTQK.L.VQD.M.I.SK...TD.HV.T.Y.....          |                | 8 : 46729  | ?     |
| g_aeqlo_scaff_4727_1.Contig6                 | RKKKT..V...S.VFQ..ST.DMKR.L.SSE.AG...C.H.T..QV.I.....N.W...---  |                | 22 : 86973 | ?     |
| g_agfda_scaff_4460_1.Contig8                 | KRKKK..T..GR..FE...Q.EIKK.L.SSE.A.M.KL..VT.QQVEI-----           |                | 26 : 93149 | ?     |
| g_artzi_scaff_4429_1.Contig73                | SN.KL..P..TQ.LLA..RK.LAKQ.L.IAE.AKFSIS.T.T.AQV.I.....A.E.-----  |                | 5 : 32215  | msx   |
| Msx_Saccoglossus_kowalevskii_                | TN.KP..P..TS.LLA..RK.RQKQ.L.IAE.A.FS.S...T..QV.I.....A.A..LQE   | ABD97280       |            |       |
| Msx_Nematostella_vectensis_                  | AN.KP..P..TS.LLA..RK.RQKQ.L.IAE.A.FS.S...T..QV.I.....A.A..LHE   | BAG11598       |            |       |
| MSX-2_Mus_musculus_                          | TN.KP..P..TS.LLA..RK.RQKQ.L.IAE.A.FSSS...T..QV.I.....A.A..LQE   | NP_038629      |            |       |
| MSX-2_Homo_sapiens_                          | TN.KP..P..TS.LLA..RK.RQKQ.L.IAE.A.FSSS...T..QV.I.....A.A..LQE   | BAA06549       |            |       |
| MSX1_Homo_sapiens_                           | TN.KP..P..TA.LLA..RK.RQKQ.L.IAE.A.FSSS.S.T..QV.I.....A.A..LQE   | NP_002439      |            |       |
| MSX1_variant_Mus_musculus_                   | TN.KP..P..TA.LLA..RK.RQKQ.L.IAE.A.FSSS.S.T..QV.I.....A.A..LQE   | AAG32466       |            |       |
| g_aebwc_scaff_4685_2.Contig8                 | -----KQ.L.IAE.A.FSSS.S.T..QV.I.....A.E..LKE                     |                | 3 : 19118  | msx   |
| g_aebwc_scaff_4685_2.Contig10                | SN.KP..P..TQ.LLA..RK.RTKQ.L.IAE.A.FSSS...T..QV.I.....A.E.-----  |                | 3 : 19118  | msx   |
| g_aebwc_scaff_4685_2.Contig13                | SN.KP..P..TQ.LLA..RK.RSKQ.L.IAE.A.FSSS...T..QV.I.....A.E.-----  |                | 3 : 19118  | msx   |
| g_aoopl_scaff_4606_1.Contig8                 | -----KQ.L.IAE.A.FSSS...T..QV.I.....A.EN.LKE-                    |                | 26 : 93149 | msx   |
| g_aoopl_scaff_4606_1.Contig18                | SS.KP..P..TK.LLA...M.QTKQ.L.IAE.A.FSSSM..T..QV.I.....A.E.-----  |                | 26 : 93149 | msx   |
| g_agizq_scaff_4515_1.Contig28                | --.R...Y.S..LLQ.....HAKK.L.LTE.SQISTT.Q.S.VQV.I.....A.W.-----   |                | 3 : 23600  | gbx   |
| unplugged_Drosophila_melanogaster_           | KS..R....S..LLE..R..HAKK.L.LTE.SQI.TS.K.S.VQV.I.....A.W..VKAG   | NP_477146      |            |       |
| AGAP006923-<br>PA_Anopeles_gambiae_str_PEST_ | KS..R....S..LLE..R..HAKK.L.LTE.SQI.TS.K.S.VQV.I.....A.W..VKAG   | EAA04094       |            |       |
| g_apstr_scaff_4456_1.Contig3                 | --.R...N..LLE..N..HCKK.L.LTE.SQI.HS.Q.S.QQV.I.....A.W.-----     |                | 1 : 8283   | gbx   |
| GBX-1_Canis_lupus_familiaris_                | KS..R....S..LLE.....HCKK.L.LTE.SQI.H..K.S.VQV.I.....A.W..IKAG   | XP_853664      |            |       |

| name                                       | sequence                                                       | accession                           | position   | class |
|--------------------------------------------|----------------------------------------------------------------|-------------------------------------|------------|-------|
|                                            | '!' for match                                                  |                                     | LG:coord.  |       |
| g_aglhj_scaff_4667_1.Contig13              | ---R....S..LLE....HSKK.L.LTE.SQI.HS.Q.S.VQV.I.....A.W.-----    |                                     | 11 : 60310 | gbx   |
| g_aglhj_scaff_4783_1.Contig4               | KS..R....S..LLE....HSKK.L.LTE.SHI.NS.Q.S.VQV.I.....A.W..VKAG   |                                     | 18 : 80043 | gbx   |
| g_acgnb_scaff_4629_1.Contig3               | RFLLSLSQR.SRNGSQATDGLHFNRLT.R..I.IVRT.C.SD-----                |                                     | 20 : 83755 | hox?  |
| g_awtvf_scaff_4744_1.Contig2               | ETK.Q...Y..H..LE....HFNR.LT.R..I.I.HSSC.ERIK.-----             |                                     | 21 : 85243 | hox?  |
| g_awtvf_scaff_4744_1.Contig1               | -----SR.LT.R.QI.I.HS.C.S.RQ..N...I...W.KDNKL                   |                                     | 21 : 85243 | hox?  |
| Drosophila-Dfd__NM_057853_                 | EPK.Q...Y..H..LE....HYNR.LT.R..I.I.HT.V.S.RQ..I.....W.KD---    | NM_057853                           |            |       |
| Tribolium-Dfd__EEZ99253_                   | EPK.Q...Y..H..LE....HYNR.LT.R..I.I.HT.V.S.RQ..I.....W.KD---    | EEZ99253                            |            |       |
| g_ajivj_scaff_4414_1.Contig4               | ETK.Q...Y..H..LE....HFNR.LT.R..I.I.HL.C.S.RQ..I.....W.KDNKL    |                                     | 15 : 71079 | hox?  |
| g_ajivj_scaff_4414_1.Contig3               | ETK.Q...Y..H..LE....HFNR.LT.R..I.I.HS.C.S.RQ..I.....W.KDNKL    |                                     | 15 : 71079 | hox?  |
| Branchiostoma-Hox4__AB028208_              | DTK.S...Y..Q.VLE....HFNR.LT.R..I.I.HS.G.T.RQ..I.....W.KD---    | AB028208                            |            |       |
| g_akvhc_scaff_4400_4.Contig7               | EAK.Q...Y..H.VLE....HFNR.LT.R..I.I.H..C.S.RQ..I.....W.KDNKL    |                                     | 18 : 79524 | hox?  |
| Capitella-Dfd__EU196540_                   | DSK.T...Y..H..LE....HFNR.LT.R..I.I.HT.C.S.RQ..I.....W.KE---    | EU196540                            |            |       |
| Lottia-Dfd__110972_                        | DSK.N...Y..H.VLE....HFNR.LT.R..I.I.HT.C.S.RQ..I.....W.KE---    | JGI Lotgii<br>protein id:<br>110972 |            |       |
| Branchiostoma-Hox12__AAF81903_             | SS.KK.CPYSKV.LLE....LYNM.IT.EQ.G.I.RKV..TDRQV.I.....M..M---    | AAF81903                            |            |       |
| Branchiostoma-Hox10__Z35150_               | VG.KK.CPY.KY..LE....LFNM...E..Q.ISRHV..SDRQV.I.....M..M---     | Z35150                              |            |       |
| Branchiostoma-Hox11__AAF81909_             | ST.KK.CPY.KY.TLE....LFNMF.T.E..Q.I.RQ..TDRQV.I.....M..M---     | AAF81909                            |            |       |
| Branchiostoma-Hox9__ABX39493_              | SS.KK.CPY..F.TLE....LYNM.LT.E..Y.ISQHV..T.RQV.I.....M.KM---    | ABX39493                            |            |       |
| Branchiostoma-Hox13__AAF81904_             | GG.KK.CPY.KY.LSV..Q.YIQNR...ET.L..SQR..TDRQV.I.....Q..L---     | AAF81904                            |            |       |
| Branchiostoma-Hox14__AAF81905_             | PV.PK.RPYSKY.LNE..N.YVQNQ.I..DK.LQ.SQK...T.RQV.I.....I.Q.KL--- | AAF81905                            |            |       |
| Capitella-post1__EU196546_                 | NPKKK.KPYSKP.VSA..N.YSTST.ITKA..K.V.RE.D.T.RQ..I.Y...I.E.KI--- | EU196546                            |            |       |
| Lottia-post1__100031_                      | TL.KR.RPYSKF...E..R.YNGST...KS..W..SQLI..S.RQ..I.....I.A.KI--- | JGI Lotgii<br>protein id:<br>100031 |            |       |
| Drosophila-AbdB__NM_080157_                | SV.KK.KPYSKF.TLE....LFNA...KQK.W...RN.Q.T.RQV.I.....N.KN---    | NM_080157                           |            |       |
| Tribolium-AbdB__EEZ99247_                  | TV.KK.KPYSKF.TLE....LFNA...KQK.W...RN...T.RQV.I.....N.KN---    | EEZ99247                            |            |       |
| g_algea_scaff_4559_1.Contig10              | TV.KK.KPYSKF.TLE....LFNA...KQK.W...RN...T.RQV.I.....S.KNAQR    |                                     | 15 : 71736 | abdB  |
| g_algea_scaff_4559_3.Contig7               | -----KPYSKF.TLE....LFNS...KQK.W...RN...T.RQV.I.....S.KSSQR     |                                     | 21 : 85120 | abdB  |
| Capitella-post2__EU196545_                 | KQ.KK.KPY..Y.TMV..N..INNS.IT.QK.W.ISCK.H.S.RQV.....R.KL---     | EU196545                            |            |       |
| Lottia-post2__89720_                       | KG.KK.KPY..Y.TMV..N..LSSS.IT.QK.W.ISCK.Q.S.RQV.....R.KL---     | JGI Lotgii<br>protein id: 89720     |            |       |
| g_aosol_scaff_4355_1.Contig18              | -----EFNR.ITQR..I.I.HY.S.S.RK..M.....S..ANEKH--                |                                     | 20 : 83145 | hox?  |
| Drosophila-ftz__NM_058159_                 | DSK.T.QTY..Y.TLE....HFNR.IT.R..IDI.N..S.S.RQ..I.....S.KD---    | NM_058159                           |            |       |
| CDX-2__Mus_musculus_                       | TKDK..VVY.DH.RLE....HFSR.ITIR.KS...T.G.S.RQV.I.....A.ERKIKKK   | AAA19645                            |            |       |
| g_amvdv_scaff_4163_3.Contig12              | TRDK..VVY.DQ.RLE....HYNR.I.IR.KT...MVG.S.RQV.I.....A.ER.NFRK   |                                     | 5 : 33811  | cdx   |
| g_aidw_scaff_4772_1.Contig14               | TKDK..VVY.DH.RLE....HYSR.ITIR.KT...TM.G.SDRQV.I.....A.ERK.ARK  |                                     | 19 : 80739 | cdx   |
| g_anovg_scaff_4508_1.Contig5               | TKEK..VVY.DH.RLE....YSR.ITIR.KS...M.G.S.RQV.I.....A.ERK.ARK    |                                     | 3 : 21395  | cdx   |
| caudal_isoform_A__Drosophila_melanogaster_ | TKDK..VVY.DF.RLE....YCTSR.ITIR.KS...QT.S.S.RQV.I.....A.ERK.NKK | NP_476954.1                         |            |       |
| Ftz__Tribolium_castaneum_                  | GNK.T.QTY..Y.TLE....HFNK.LT.R..I.I.ES.R.T.RQ..I.....A.KDTKF    | AF321227_1                          |            |       |
| Tribolium-ftz__AAC46491_                   | GNK.T.QTY..Y.TLE....HFNK.LT.R..I.I.ES.R.T.RQ..I.....A.KD---    | AAC46491                            |            |       |
| g_acrop_scaff_4310_1.Contig8               | APK.T.QTY..Y.TLE....HFNK.LT.R..I.I.HT.G.T.RQ..I.....E.KENK-    |                                     | 15 : 71825 | hox?  |
| g_awjsf_scaff_4464_1.Contig11              | --K.T.QTY..Y.TLE....HFNK.LT.R..I.I.HT.G.T.RQ..I.....           |                                     | 21 : 85120 | hox?  |
| g_awjsf_scaff_4464_1.Contig15              | APK.T.QTY..Y.TLE....HFNR.LT.R..I.I.HT.G.T.RQ..I.....A.KENKF    |                                     | 21 : 85120 | hox?  |
| g_avhgw_scaff_4510_1.Contig7               | --K.T.QTY..Y.TLE....HFNR.LT.R..I.I.HS.G.T.RQ..I.....A.KEMPK    |                                     | 18 : 79607 | hox?  |
| g_alkdk_scaff_4677_1.Contig4               | DQ..S.QTYSFY.TLA....HFDP.LTKR..I.I.HT..K.KQ..I.....W.KEKRS     |                                     | 28 : 94741 | hox?  |
| g_ascty_scaff_4257_1.Contig45              | DQ..S.QTYSFY.TLA....HLDP.LTQR..I.I.HT..T.KQ.QI.....W.KENKT     |                                     | 17 : 77601 | hox?  |
| hox_6_Saccoglossus                         | -Q..G.QTY..Y.TLE....HFNR.LT.R..I.I.HT.G.T.RQ..I.....W.KEQK-    | ABK00020                            |            |       |
| hox_7_Saccoglossus                         | -KK.C.QTY..Y.TLE....HYNR.LT.R..I.I.SHL.G.T.RQ..I.....Y.KESK-   | AAAP79287                           |            |       |
| Capitella-lox5__EU196542_                  | EQK.T.QTY..Y.TLE....HYNR.LT.R..I.I.H..Q.T.RQ..I.....Y.KE---    | EU196542                            |            |       |
| g_anoef_scaff_4410_1.Contig27              | PR..G.QSY..F.TLE....HFNH.LT.R..I..HVVC.T.RQ..I.....L.KEVRV     |                                     | 3 : 23600  | hox?  |

| name                          | sequence                                                      | accession                          | position  | class |
|-------------------------------|---------------------------------------------------------------|------------------------------------|-----------|-------|
|                               | '!' for match                                                 |                                    | LG:coord. |       |
| g_awjsf_scaff_4464_1.Contig6  | ----G.Q.Y..F.TLE.....HYNH.LT.R..I.I.HVVC.T-----               |                                    | 21: 85120 | hox?  |
| g_ajivj_scaff_4414_1.Contig2  | ---.S.Q.Y..F.TLE.....HYNH.LT.R..I.I.HVVC.T-----               |                                    | 15: 71079 | hox?  |
| g_anoef_scaff_4410_1.Contig17 | -----LE.....HYNH.LT.R..I.I.HVVC.T.RQ..I.....L.KEIR.           |                                    | 3: 23600  | hox?  |
| Lottia-lox4__156931_          | .R..G.QTYS.Y.TLE.....QFNH.LT.K..I.I.H.T.C.T.RQ..I.....M.KE--- | JGI Lotg1<br>protein id:<br>156931 |           |       |
| Capitella-lox4__EU196543_     | .R..G.QTYS.Y.TLE.....QFNH.LT.K..I.I.H..C.T.RQ..I.....L.KE---  | EU196543                           |           |       |
| g_awgsh_scaff_4551_1.Contig4  | -R..G.QTY..F.TLE.....HFNH.LT.R..I.I.H..C.T.RQ..I.....L.KEIR.  |                                    | 15: 71699 | hox?  |
| g_aqqvq_scaff_4781_1.Contig5  | -----HFNH.LT.R..I.I.H..C.T.RQ..I.....L.KEIR.                  |                                    | 21: 85040 | hox?  |
| g_asnox_scaff_4479_1.Contig10 | -----HFNH.LT.R..I.I.H..C.T.RQ..I.....L.KEIR.                  |                                    | 15: 71793 | hox?  |
| g_asnox_scaff_4479_1.Contig18 | -----HFNH.LT.R..I.I.H..C.T.RQ..I.....L.KEIR.                  |                                    | 15: 71793 | hox?  |
| Drosophila-abdA__NM_057345_   | PR..G.QTY..F.TLE.....HFNH.LT.R..I.I.H..C.T.RQ..I.....L.KE---  | NM_057345                          |           |       |
| Tribolium-abdA__AAB70263_     | PR..G.QTY..F.TLE.....HFNH.LT.R..I.I.H..C.T.RQ..I.....L.KE---  | AAB70263                           |           |       |
| g_aqqvq_scaff_4781_1.Contig10 | -----YP.Y.TLE.....HTNH.LT.R..I.M.H..C.T.RQ..I.....L.KEIQ.     |                                    | 21: 85040 | ubx   |
| g_asnox_scaff_4479_1.Contig17 | -----LT.R..I.M.H..C.T.RQ..I.....L.KEIQ.                       |                                    | 15: 71793 | ubx   |
| g_asnox_scaff_4479_1.Contig21 | LR..G.QTY..Y.TLE.....HTNH.LT.R..I.M.H..C-----                 |                                    | 15: 71793 | ubx   |
| g_aityy_scaff_4289_1.Contig2  | LR..G.QTY..Y.TLE.....HTNH.LT.R..I.M.H..C.T.RQ..I.....         |                                    | 10: 54444 | ubx   |
| Drosophila-Ubx__NM_080500_    | LR..G.QTY..Y.TLE.....HTNH.LT.R..I.M.H..C.T.RQ..I.....L.KE---  | NM_080500                          |           |       |
| Tribolium-Ubx__EEZ99249_      | LR..G.QTY..Y.TLE.....HTNH.LT.R..I.M.H..C.T.RQ..I.....L.KE---  | EEZ99249                           |           |       |
| g_asnox_scaff_4479_1.Contig28 | LR..G.QTY..Y.TLE.....HTNH.LT.R..I.M.H..C.T.RQ..I.....L.KEIQ.  |                                    | 15: 71793 | ubx   |
| Capitella-lox2__EU196544_     | .R..G.QTY..Y.TLE.....KFNH.LT.R..I..SHM.C.T.RQ..I.....E.KE---  | EU196544                           |           |       |
| Lottia-lox2__185752_          | .R..G.QTY..F.TLE.....KFNH.LT.R..I..SHM.C.T.RQ..I.....E.KE---  | JGI Lotg1<br>protein id:<br>185752 |           |       |
| Branchiostoma-Hox8__ABX39492_ | ER..G.QTYS.Y.TLE.....HFNK.LT.R..I.I.H..G.T.RQ..I.....L.KE---  | ABX39492                           |           |       |
| Branchiostoma-Hox7__ABX39491_ | ERK.G.QTY..Y.TLE.....HFNK.LT.R..I.I.H..C.T.RQ..I.....W.KE---  | ABX39491                           |           |       |
| Lottia-lox5__89598_           | EQK.T.QTY..Y.TLE.....HFNH.LT.R..I.V.HM.G.T.RQ..I.....W.KE---  | JGI Lotg1<br>protein id: 89598     |           |       |
| Branchiostoma-Hox6__ABX39490_ | EKK.G.QTY..Y.TLE.....HFNK.LT.K..I.I.HL.G.T.RQ..I.....W.KE---  | ABX39490                           |           |       |
| g_aubsu_scaff_4356_1.Contig13 | ERK.G.QTY..Y.TLE.....HFNH.LT.R..I.I.H..C.T.RQ..I.....W.KENK.  |                                    | 15: 71793 | hox?  |
| g_aubsu_scaff_4356_1.Contig10 | ERK.G.QTY..Y.TLE.....HFNH.LT.R..I.I.H..C.T.RQ..I.....W.KENK.  |                                    | 15: 71793 | hox?  |
| Drosophila-Antp__NM_079525_   | ERK.G.QTY..Y.TLE.....HFNH.LT.R..I.I.H..C.T.RQ..I.....W.KE---  | NM_079525                          |           |       |
| Tribolium-Antp__EEZ99250_     | ERK.G.QTY..Y.TLE.....HFNH.LT.R..I.I.H..C.T.RQ..I.....W.KE---  | EEZ99250                           |           |       |
| Capitella-Antp__EU196547_     | ERK.G.QTY..Y.TLE.....HFNH.LT.R..I.I.H..C.T.RQ..I.....W.KE---  | EU196547                           |           |       |
| Lottia-Antp__177860_          | NRK.G.QTY..Y.TLE.....HFNH.LT.R..I.I.H..C.T.RQ..I.....W.KE---  | JGI Lotg1<br>protein id:<br>177860 |           |       |
| Hox8_Metacrinus               | -KK.G.QTY..Y.TLE.....HFNH.LT.R..I.I.Q.VC.S.RQ..I.....A.KEETS- | BAF43726                           |           |       |
| g_atxvn_scaff_4590_1.Contig3  | -----LT.R..I.I.H..C.T.RQ..I.....W.QENK.                       |                                    | 5: 33116  | hox?  |
| g_awjsf_scaff_4464_1.Contig1  | --K.G.QTY..Y.TLE.....HFNH.LT.R..I.I-----                      |                                    | 21: 85120 | hox?  |
| g_awjsf_scaff_4464_1.Contig8  | ERK.G.QTY..Y.TLE.....HFNH.LT.R..I.I.H..C.T.R-----             |                                    | 21: 85120 | hox?  |
| g_asety_scaff_4257_1.Contig27 | -----TLE.....HFNH.LT.R..I.I.H..C.T.RQ..I-----                 |                                    | 17: 77601 | hox?  |
| g_alkdk_scaff_4677_1.Contig1  | -----TY..Y.TLE.....HFNH.LT.R..I.I.H..C.T-----                 |                                    | 28: 94741 | hox?  |
| hox_5_Saccoglossus            | -AK.S...Y..Y.TLE.....HFNH.LT.R..I.I.H..G.S.RQ..I.....W.KEHN-  | NP_001158410                       |           |       |
| Branchiostoma-Hox5__ABX39489_ | DNK.T...Y..Y.TLE.....HFNH.LT.R..I.I.H..C.T.RQ..I.....W.KE---  | ABX39489                           |           |       |
| Scr__Tribolium_castaneum_     | ETK.Q..SY..Y.TLE.....HFNH.LT.R..I.I.H..C.T.RQ..I.....W.KEHKM  | AF321227_2                         |           |       |
| Drosophila-Scr__X14475_       | ETK.Q..SY..Y.TLE.....HFNH.LT.R..I.I.H..C.T.RQ..I.....W.KE---  | X14475                             |           |       |
| Tribolium-Scr__EEZ99252_      | ETK.Q..SY..Y.TLE.....HFNH.LT.R..I.I.H..C.T.RQ..I.....W.KE---  | EEZ99252                           |           |       |
| g_anoef_scaff_4410_1.Contig19 | -----HFNH.LT.R..I.I.H..C.S.RQ..I.....W.KEHKM                  |                                    | 3: 23600  | hox?  |
| g_asnox_scaff_4479_1.Contig12 | -----SY..Y.TLE.....HFNH.LT.R..I.I.H..C.S.RQ..I-----           |                                    | 15: 71793 | hox?  |
| g_awjsf_scaff_4464_1.Contig7  | ETK.Q..SY..Y.TLE.....HFNH.LT.R..I.I.H..C.S.RQ..I.....W.KEH--  |                                    | 21: 85120 | hox?  |
| g_anbio_scaff_4694_1.Contig9  | ETK.Q..SY..Y.TLE.....HFNH.LT.R..I.I.H..C.S.RQ..I.....W.KEHKM  |                                    | 15: 71825 | hox?  |

| name                               | sequence                                                        | accession                          | position  | class  |
|------------------------------------|-----------------------------------------------------------------|------------------------------------|-----------|--------|
|                                    | '!' for match                                                   |                                    | LG:coord. |        |
| g_anbio_scaff_4694_1.Contig10      | ETK.Q..SY..Y.TLE.....HFNR.LT.R..I.I.H..C.S.RQ..I.....W.KEHKM    |                                    | 15:71825  | hox?   |
| g_awjsf_scaff_4464_1.Contig5       | --K.Q..SY..Y.TLE.....HFNR.LT.R..I.I.H..C.S-----                 |                                    | 21:85120  | hox?   |
| Lottia-Scr_86927_                  | DSK.S..SY..H.TLE.....HYNK.LT.R..I.I.H...T.RQ..I.....W.KD---     | JGI Lotg1<br>protein id: 86927     |           |        |
| Capitella-Scr_EU196541_            | DNK.T..SY..H.TLE.....HFNR.LT.R..I.I.HS...T.RQ..I.....W.KE---    | EU196541                           |           |        |
| pancreas_duodenum__1_Mus_musculus_ | ENK.T...Y..A.LLE.....LFNK.I.....V...VM...T.RH..I.....W.KEEDK    | NP_032840                          |           |        |
| Branchiostoma-Hox2_AB028207_       | SS..L..V..NT.LLE.....HYNK..CK...K.I.SY.D.N.RQV.I.....RQ..R---   | AB028207                           |           |        |
| g_axtpu_scaff_4896_1.Contig3       | ---SG..N..TK.L...N..LFNK.LT.K..I.I...IQ.N..QV.I.....Q.KRMKE     |                                    | 9:53730   | labial |
| g_axtpu_scaff_4896_1.Contig4       | ---SG..N..TK.L.G..N..LFNK.LT.K..I.I...IQ.N..QV.-----            |                                    | 9:53730   | labial |
| Drosophila-labial_NM_057265_       | -NNSG..N..NK.LTE.....HFNR.LT.A..I.I.NT.Q.N..QV.I.....Q.KRV--    | NM_057265                          |           |        |
| Tribolium-labial_AAF64149_         | CLNTG..N..NK.LTE.....HFNK.LT.A..I.I.S..Q.N..QV.I.....Q.KR---    | AAF64149                           |           |        |
| g_axtpu_scaff_4896_1.Contig2       | -----LT.A..I.I.T..Q.N..QV.I.....Q.KRMKE                         |                                    | 9:53730   | labial |
| g_ajwnd_scaff_4604_1.Contig5       | -VGS..N..TK.LTE.....HFNK.LT.A..I.I.T..Q.N..QV.I.....Q.KRMKE     |                                    | 15:71825  | labial |
| g_aavsb_scaff_4656_1.Contig15      | ---G..N..TK.LTE.....HFNK.LT.A..I.I.N..Q.N..QV.I.....Q.KRMKE     |                                    | 18:79564  | labial |
| g_arkho_scaff_4547_1.Contig2       | ---G..N..TK.LTE.....HFNK.LT.A..I.I.NV.Q.N..QV.I.....Q.-----     |                                    | 1:5456    | labial |
| g_aavsb_scaff_4656_1.Contig7       | -----I.I.NV.Q.N..QV.I.....Q.KRMKE                               |                                    | 18:79564  | labial |
| Branchiostoma-Hox1_AB028206_       | GPNNG..N..TK.LTE.....HYNK.LT.A..V.I.....N..QV.I.....Q.KR---     | AB028206                           |           |        |
| Capitella-labial_EU196537_         | -PNMG..N..NK.LTE.....HFNK.LT.A..I.I..S.G.N..QV.I.....Q.KRL--    | EU196537                           |           |        |
| Lottia-labial_100648_              | -PNSG..N..NK.LTE.....HFNK.LT.A..I.I..S.G.N..QV.I.....Q.KR---    | JGI Lotg1<br>protein id:<br>100648 |           |        |
| Lottia-pb_110623_                  | GS..L...Y.NT.LLE.....HFNK.LC...I.I..S.D.T.RQV.....Y.-----       | JGI Lotg1<br>protein id:<br>110623 |           |        |
| Drosophila-pb_NM_057322_           | LP..L...Y.NT.LLE.....HFNK.LC...I.I..S.D.T.RQV.....H.-----       | NM_057322                          |           |        |
| Tribolium-pb_EEZ99256_             | LP..L...Y.NT.LLE.....HFNK.LC...I.I..S.D.T.RQV.....H.-----       | EEZ99256                           |           |        |
| g_adlvn_scaff_4304_2.Contig14      | MP..L...Y.NT.LLE.....HFNK.LC...I.I..S.D.S.RQV.....H...TMM       |                                    | 15:71870  | ?      |
| g_agkld_scaff_4527_1.Contig4       | MP..L...Y.NT.LLE.....HFNK.LC...I.I..S.D.S.RQV.....H...TVM       |                                    | 3:19288   | ?      |
| g_apppz_scaff_4373_1.Contig11      | MP..L...Y.NT.LLE.....HFNK.LC...I.I..S.D.S.RQV.....H...TTM       |                                    | 21:85040  | ?      |
| g_adlvn_scaff_4304_2.Contig9       | MP..L...Y.NT.LLE.....HFNK.LC.....                               |                                    | 15:71870  | ?      |
| Capitella-pb_EU196538_             | HP..L...Y.NT.LLE.....HFNK.LC...I.I..S.D.T.RQV.....F.-----       | EU196538                           |           |        |
| Tribolium-zen_NP_001036813_        | AGK.A...Y.SA.LVE..R..HHGK.L...IQI.EN...S.RQ..I.....H.KE---      | NP_001036813                       |           |        |
| g_adhdu_scaff_4669_1.Contig2       | PTK.V...Y.SA.LVE.....HFNR.LC...I.M.NL...T.RQ..I.....Y.K---      |                                    | 21:85075  | hox3   |
| g_amdsu_scaff_4454_1.Contig21      | --K.A...Y.SA.LVE.....HFNR.LC...V.M.NL.S.T.RQ..I.....Y.KEQKN     |                                    | 15:71825  | hox3   |
| Capitella-Hox3_EU196539_           | PSK.A...Y.SA.LVE.....HFNR.LC...I.M..L..T.RQ..I.....Y.KD---      | EU196539                           |           |        |
| Lottia-Hox3_56601_                 | PAK.A...Y.SA.LVE.....HFNR.LC...I.M..L..S.RQ-----                | JGI Lotg1<br>protein id: 56601     |           |        |
| g_amdsu_scaff_4454_1.Contig17      | --K.P...Y.TA.LTE.....HFTR.LC...V.M.GL.H.T.RQ..I.....            |                                    | 15:71825  | hox3   |
| Branchiostoma-Hox3_X68045_         | AGK.A...Y.SA.LVE.....HFNR.LC...V.M..M...T.RQ..I.....Y.KE---     | X68045                             |           |        |
| Drosophila-zen_AAF54087_           | KLK.S.....SV.LVE..N..KSNM.LY.T..I.I.QR.S.C.RQV.I.....F.KD---    | AAF54087                           |           |        |
| g_aheja_scaff_4145_1.Contig5       | KTK.T..S.NGV.LLE.....TNNM.L..L..I.I.NY...S.KQV.I.....V.F.KEG--  |                                    | 23:89444  | gsx    |
| g_atxvn_scaff_4590_1.Contig4       | SSKKI..VY..S.LLE..R..AANM.LT.L..I.I.TY.S.S.KQV.I.....V.Y.KE---  |                                    | 5:33116   | gsx    |
| g_aneyu_scaff_4415_1.Contig10      | SSK.I.....ST.LLE..R..SANM.L..L..I.I.TY...S.KQV.I.....V.Y.KE---  |                                    | 6:37542   | gsx    |
| Gsx1__Mus_musculus_                | SSK.M.....ST.LLE..R..ASN.M.L..L..I.I.TY...S.KQV.I.....V.H.KEGKG | AAI37770.1                         |           |        |
| g_aucja_scaff_4557_1.Contig17      | --K.I.....SA.LLE..R..STNM.L..I..I.ISKY...S.KQV.I.....V.H.KEG--  |                                    | 19:80662  | gsx    |
